# Supplementary material for: Beneficial effects of moderate to vigorous physical activity on cardiovascular disease among Chinese adults
Source: PubMed Central journal article supplement — J Geriatr Cardiol. 2020 Feb;17(2):85–95. doi: 10.11909/j.issn.1671-5411.2020.02.001 (PMC7051870; doi:10.11909/j.issn.1671-5411.2020.02.001), 2020-02
Supplement: jgc-17-02-085-supplemental.pdf [file jgc-17-02-085-supplemental.pdf]

## Supplementary Table

**Table 1S. Hazard ratios for CVD by baseline MVPA categories, excluding those developing CVD within first two years of follow-up.**

| Variable                      | Inactive<br>(n = 32,295) | Meeting recommended MVPA |                            |                                   |                               | <i>P</i> <sub>trend</sub> <sup>#</sup><br>value <sup>#</sup> |
|-------------------------------|--------------------------|--------------------------|----------------------------|-----------------------------------|-------------------------------|--------------------------------------------------------------|
|                               |                          | All<br>(n = 66,932)      | Low-active<br>(n = 15,028) | Moderately-active<br>(n = 22,514) | Highly-active<br>(n = 29,390) |                                                              |
| <b>CVD</b>                    |                          |                          |                            |                                   |                               |                                                              |
| Number of cases               | 1635                     | 2348                     | 750                        | 723                               | 875                           |                                                              |
| HR (95% CI) <sup>*</sup>      | 1.00 (ref.)              | 0.75 (0.70–0.81)         | 0.91 (0.83–1.00)           | 0.70 (0.63–0.77)                  | 0.62 (0.56–0.68)              | < 0.001                                                      |
| <b>Stroke</b>                 |                          |                          |                            |                                   |                               |                                                              |
| Number of cases               | 870                      | 1555                     | 460                        | 494                               | 601                           |                                                              |
| HR (95% CI) <sup>*</sup>      | 1.00 (ref.)              | 0.93 (0.84–1.02)         | 1.04 (0.92–1.17)           | 0.90 (0.80–1.02)                  | 0.82 (0.72–0.93)              | 0.001                                                        |
| <b>Coronary heart disease</b> |                          |                          |                            |                                   |                               |                                                              |
| Number of cases               | 515                      | 536                      | 200                        | 152                               | 184                           |                                                              |
| HR (95% CI) <sup>*</sup>      | 1.00 (ref.)              | 0.58 (0.51–0.67)         | 0.75 (0.63–0.90)           | 0.51 (0.42–0.62)                  | 0.46 (0.37–0.56)              | < 0.001                                                      |
| <b>Heart failure</b>          |                          |                          |                            |                                   |                               |                                                              |
| Number of cases               | 192                      | 202                      | 64                         | 59                                | 79                            |                                                              |
| HR (95% CI) <sup>*</sup>      | 1.00 (ref.)              | 0.46 (0.36–0.59)         | 0.75 (0.56–1.01)           | 0.39 (0.28–0.53)                  | 0.33 (0.24–0.45)              | < 0.001                                                      |
| <b>CVD death</b>              |                          |                          |                            |                                   |                               |                                                              |
| Number of cases               | 692                      | 820                      | 264                        | 250                               | 306                           |                                                              |
| HR (95% CI) <sup>*</sup>      | 1.00 (ref.)              | 0.68 (0.60–0.76)         | 0.85 (0.73–0.99)           | 0.61 (0.52–0.72)                  | 0.55 (0.47–0.65)              | < 0.001                                                      |

<sup>\*</sup>Refers to adjusted for age, sex, geographic region, urbanization, education, family history of CVD, current smoking status, alcohol consumption, light physical activity, and cohort sources. <sup>#</sup>Refers to *P*-value for linear trend across inactive, low-active, moderately-active, and highly-active categories. CI: confidence interval; CVD: cardiovascular disease; HR: hazard ratio; MVPA: moderate to vigorous physical activity.
